# Supplementary material
Source: PubMed Central journal article supplement (PMC3299880)

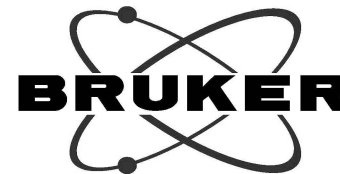

NAME Feb08-2010-otito  
EXPNO 10  
PROCNO 1  
Date\_ 20100208  
Time 17.30  
INSTRUM spect  
PROBHD 5 mm PABBO BB-  
PULPROG zg30  
TD 65536  
SOLVENT MeOD  
NS 16  
DS 2  
SWH 8223.685 Hz  
FIDRES 0.125483 Hz  
AQ 3.9846387 sec  
RG 181  
DW 60.800 usec  
DE 6.50 usec  
TE 296.2 K  
D1 1.00000000 sec  
TD0 1

===== CHANNEL f1 =====  
NUC1 1H  
P1 14.80 usec  
PL1 1.00 dB  
PL1W 8.75920200 W  
SFO1 400.1324710 MHz  
SI 32768  
SF 400.1300463 MHz  
WDW EM  
SSB 0  
LB 0.30 Hz  
GB 0  
PC 1.00

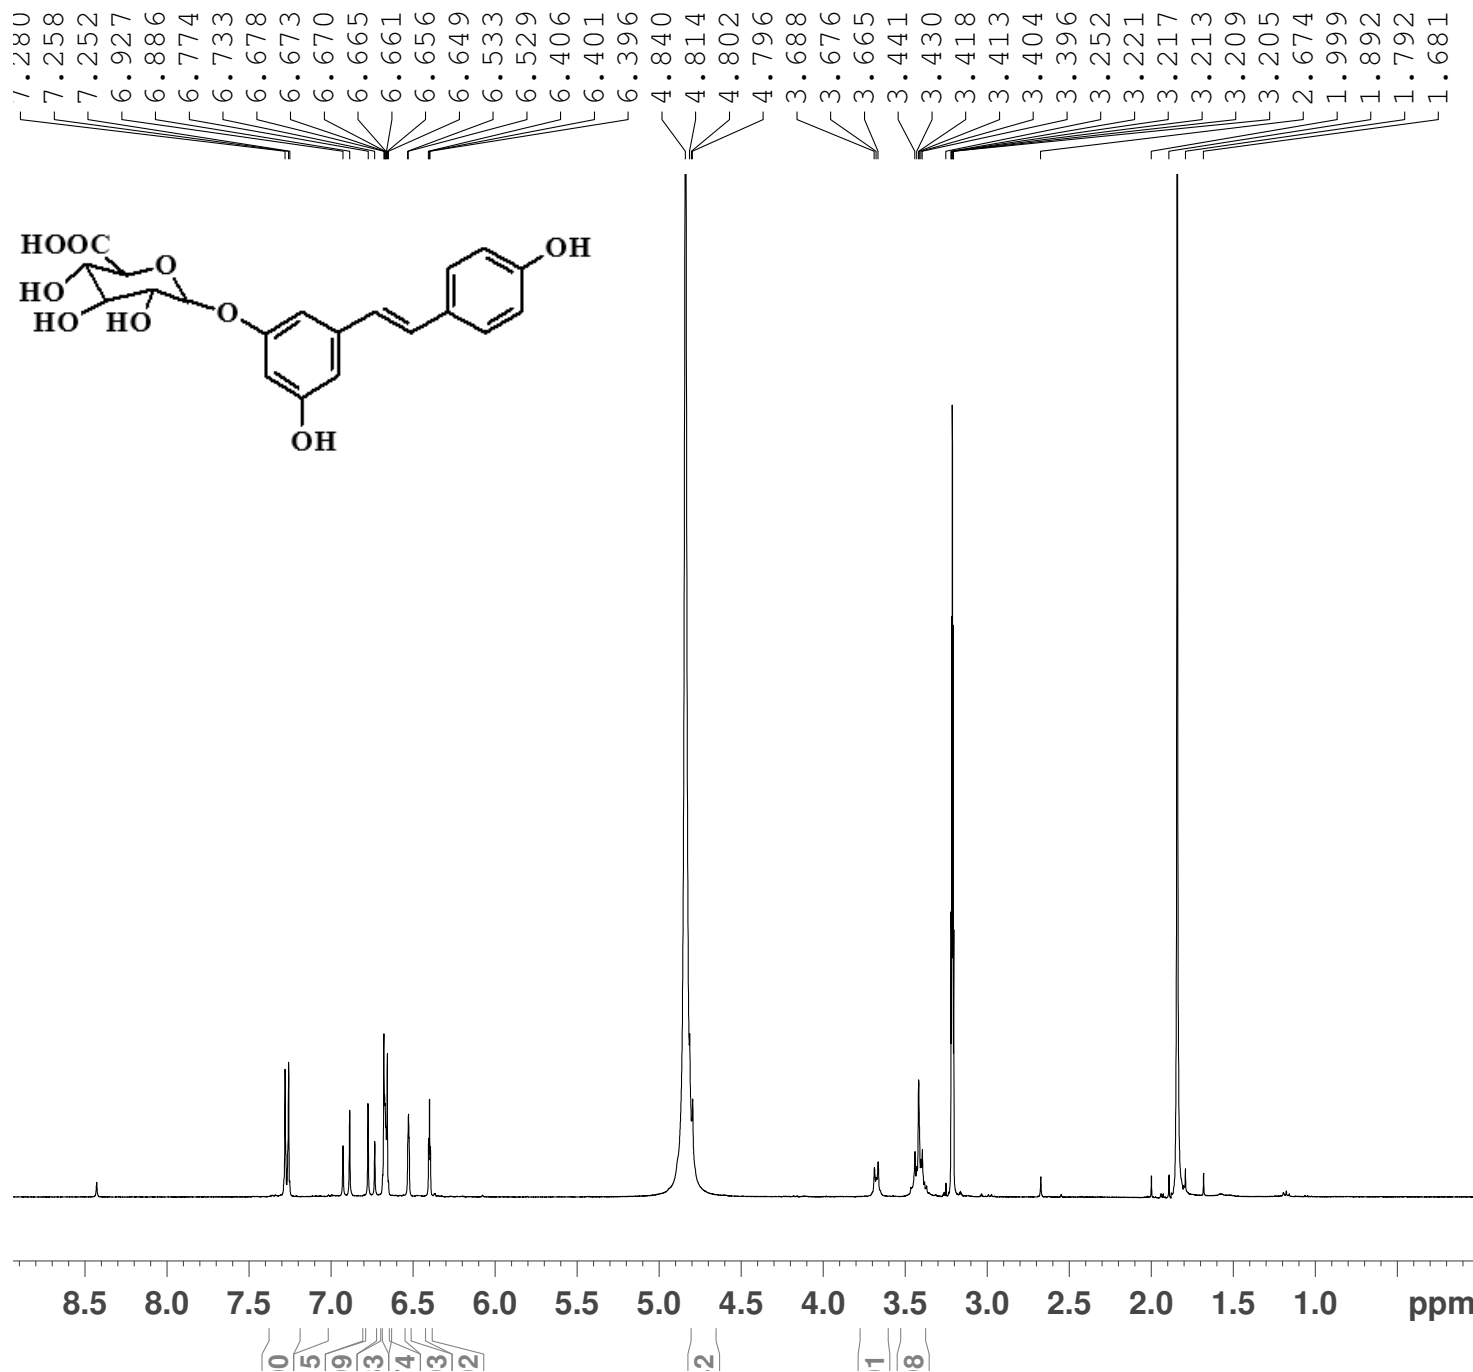

Supplement: NIHMS345799-supplement-01.pdf [file NIHMS345799-supplement-01.pdf]
