# Supplementary material
Source: PubMed Central journal article supplement (PMC3299880)
Supplement: NIHMS345799-supplement-02.pdf [file NIHMS345799-supplement-02.pdf]

R3G

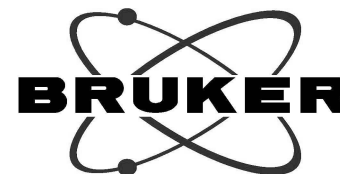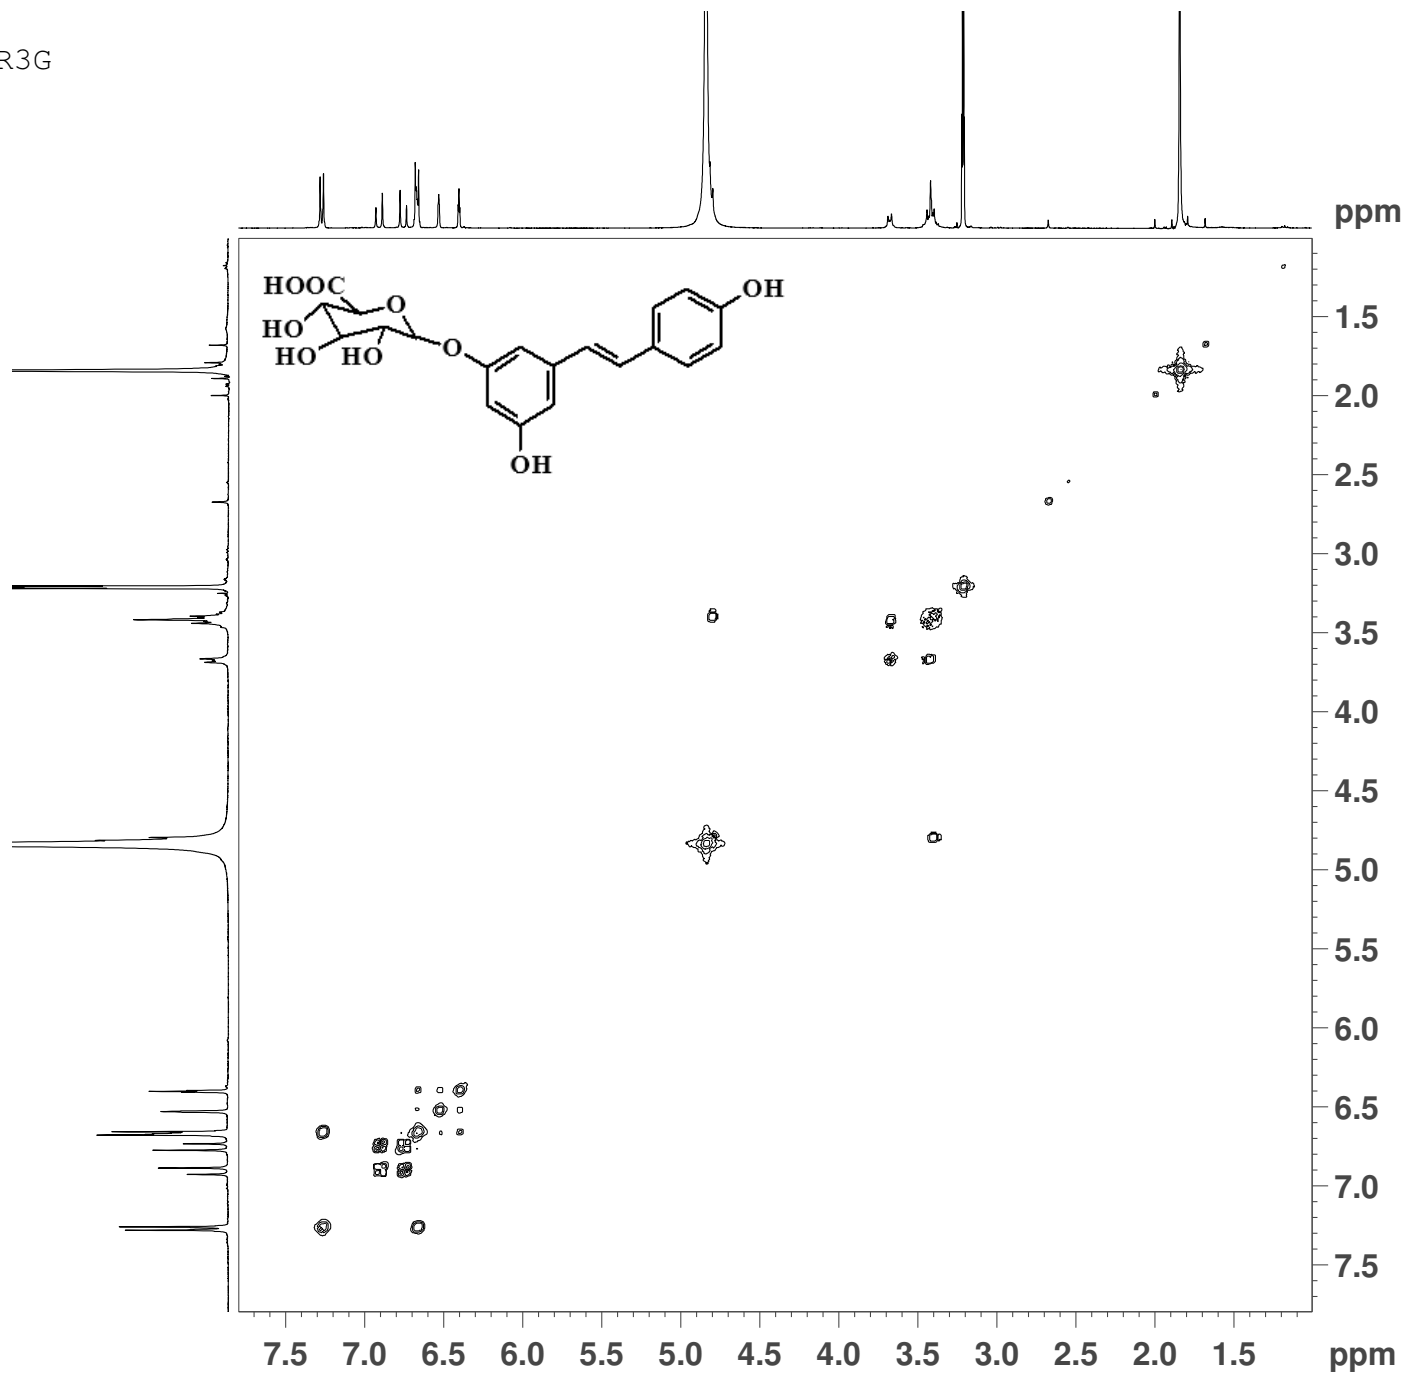

NAME Feb08-2010-otito  
EXPNO 21  
PROCNO 1  
Date\_ 20100208  
Time 17.37  
INSTRUM spect  
PROBHD 5 mm PABBO BB-  
PULPROG cosygpgf  
TD 2048  
SOLVENT MeOD  
NS 1  
DS 8  
SWH 2717.391 Hz  
FIDRES 1.326851 Hz  
AQ 0.3768820 sec  
RG 64  
DW 184.000 usec  
DE 6.50 usec  
TE 296.2 K  
D0 0.00000300 sec  
D1 1.30175304 sec  
D13 0.00000400 sec  
D16 0.00020000 sec  
IN0 0.00036800 sec

==== CHANNEL f1 =====  
NUC1 1H  
P0 14.80 usec  
P1 14.80 usec  
PL1 1.00 dB  
PL1W 8.75920200 W  
SFO1 400.1318073 MHz

==== GRADIENT CHANNEL =====  
GPNAM1 SINE.100  
GPZ1 10.00 %  
P16 1000.00 usec  
ND0 1  
TD 128  
SFO1 400.1318 MHz  
FIDRES 21.229620 Hz  
SW 6.791 ppm  
FnMODE QF  
SI 1024  
SF 400.1300463 MHz  
WDW SINE  
SSB 0  
LB 0.00 Hz  
GB 0  
PC 1.40  
SI 1024  
MC2 QF  
SF 400.1300463 MHz  
WDW SINE  
SSB 0  
LB 0.00 Hz  
GB 0
