# Supplementary material
Source: PubMed Central journal article supplement (PMC3299880)
Supplement: NIHMS345799-supplement-03.pdf [file NIHMS345799-supplement-03.pdf]

Peak at 26 mins

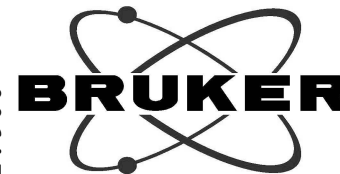

7.404  
7.382  
7.070  
7.029  
6.993  
6.989  
6.985  
6.902  
6.862  
6.795  
6.790  
6.778  
6.773  
6.766  
6.758  
6.753  
6.749  
6.682  
6.676  
6.671  
4.940  
4.918  
4.840  
4.615  
3.501  
3.387  
3.383  
3.379  
3.375  
3.371  
3.368  
3.356  
3.352  
3.348  
3.287  
3.283  
3.279  
3.275  
3.271  
3.152  
3.148  
2.000  
1.950  
1.900

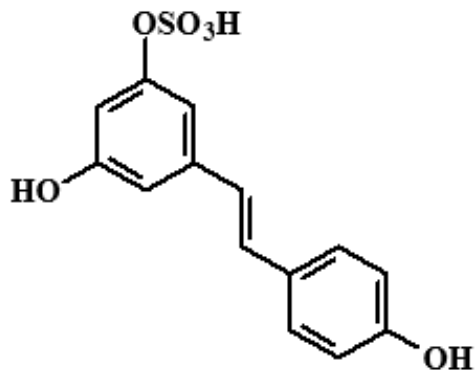

NAME Sep22-2009-otito  
EXPNO 20  
PROCNO 1  
Date\_ 20090922  
Time 14.59  
INSTRUM spect  
PROBHD 5 mm PABBO BB-  
PULPROG zg30  
TD 65536  
SOLVENT MeOD  
NS 16  
DS 2  
SWH 8223.685 Hz  
FIDRES 0.125483 Hz  
AQ 3.9846387 sec  
RG 203  
DW 60.800 usec  
DE 6.50 usec  
TE 296.6 K  
D1 1.00000000 sec  
TD0 1

===== CHANNEL f1 =====  
NUC1 1H  
P1 14.80 usec  
PL1 1.00 dB  
PL1W 8.75920200 W  
SFO1 400.1324710 MHz  
SI 32768  
SF 400.1300000 MHz  
WDW EM  
SSB 0  
LB 0.30 Hz  
GB 0  
PC 1.00

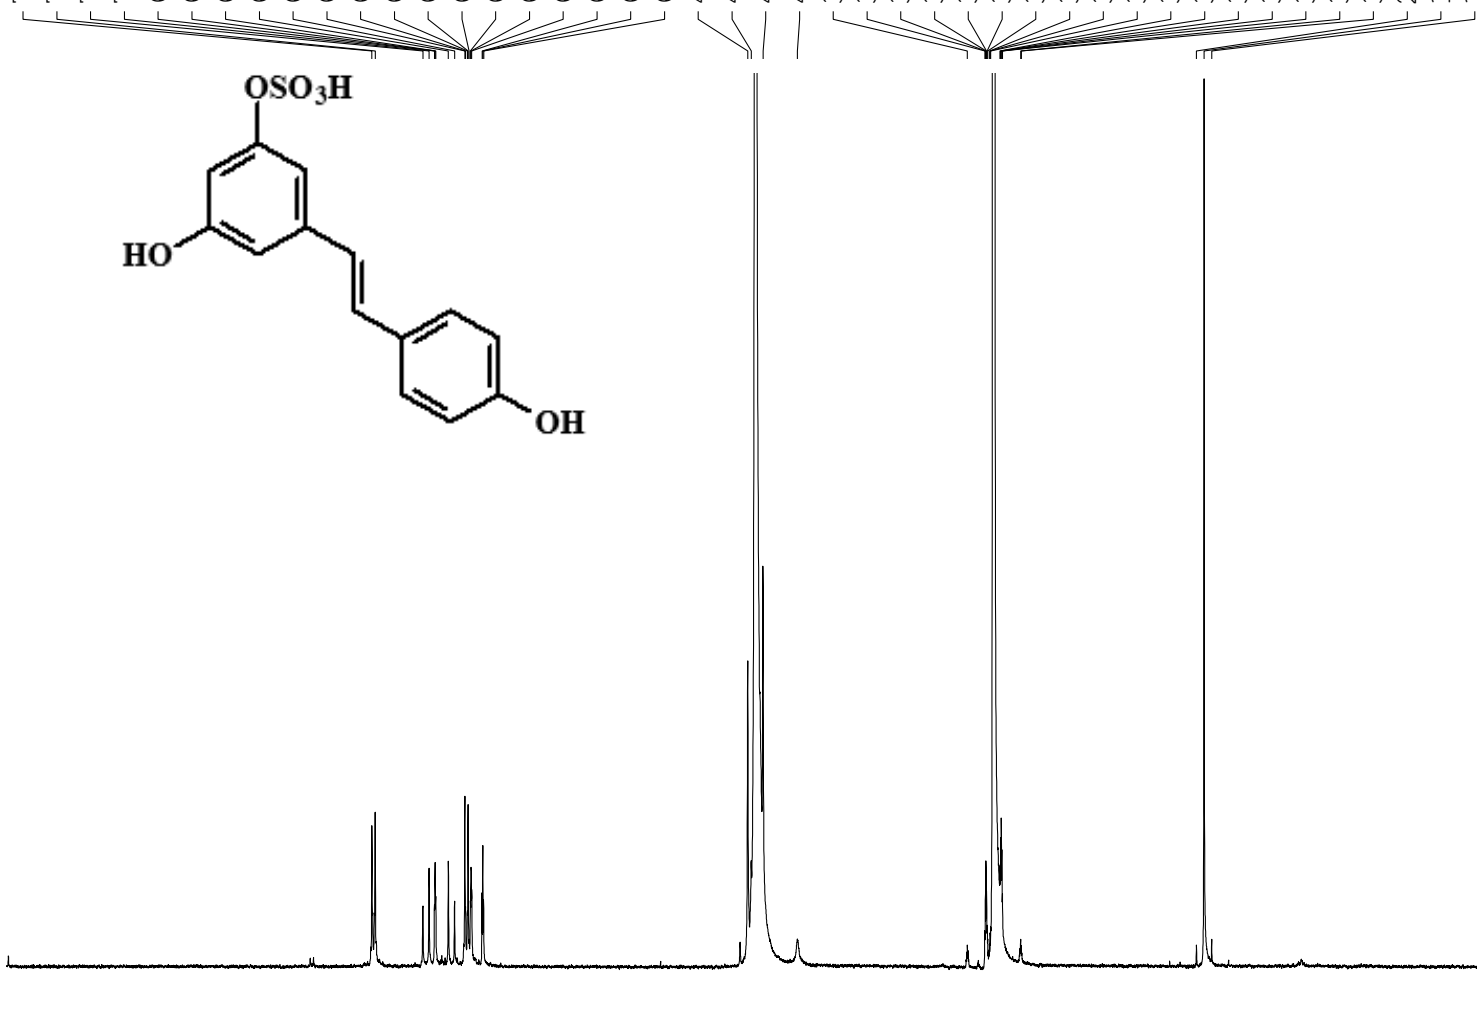

9.5 9.0 8.5 8.0 7.5 7.0 6.5 6.0 5.5 5.0 4.5 4.0 3.5 3.0 2.5 2.0 1.5 1.0 ppm

2.00  
2.09  
1.06  
3.12  
0.92

3.35
