# Supplementary material
Source: PubMed Central journal article supplement (PMC3299880)
Supplement: NIHMS345799-supplement-04.pdf [file NIHMS345799-supplement-04.pdf]

Res-4' Gluc- 15mins

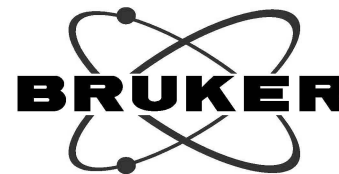

8.526  
7.451  
7.429  
7.112  
7.090  
7.009  
6.969  
6.888  
6.848  
6.461  
6.456  
6.167  
6.161  
6.156  
4.926  
4.921  
4.908  
4.882  
4.833  
3.767  
3.744  
3.533  
3.512  
3.507  
3.499  
3.491  
3.477  
3.355  
3.344  
3.329  
3.313  
3.309  
3.305  
3.301  
3.297  
3.259  
3.255  
3.251  
2.085  
1.978  
1.956  
1.928  
1.878  
1.767

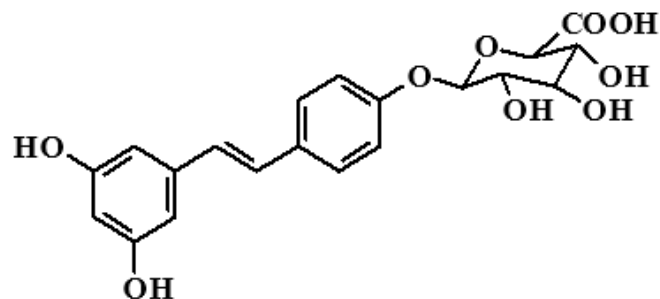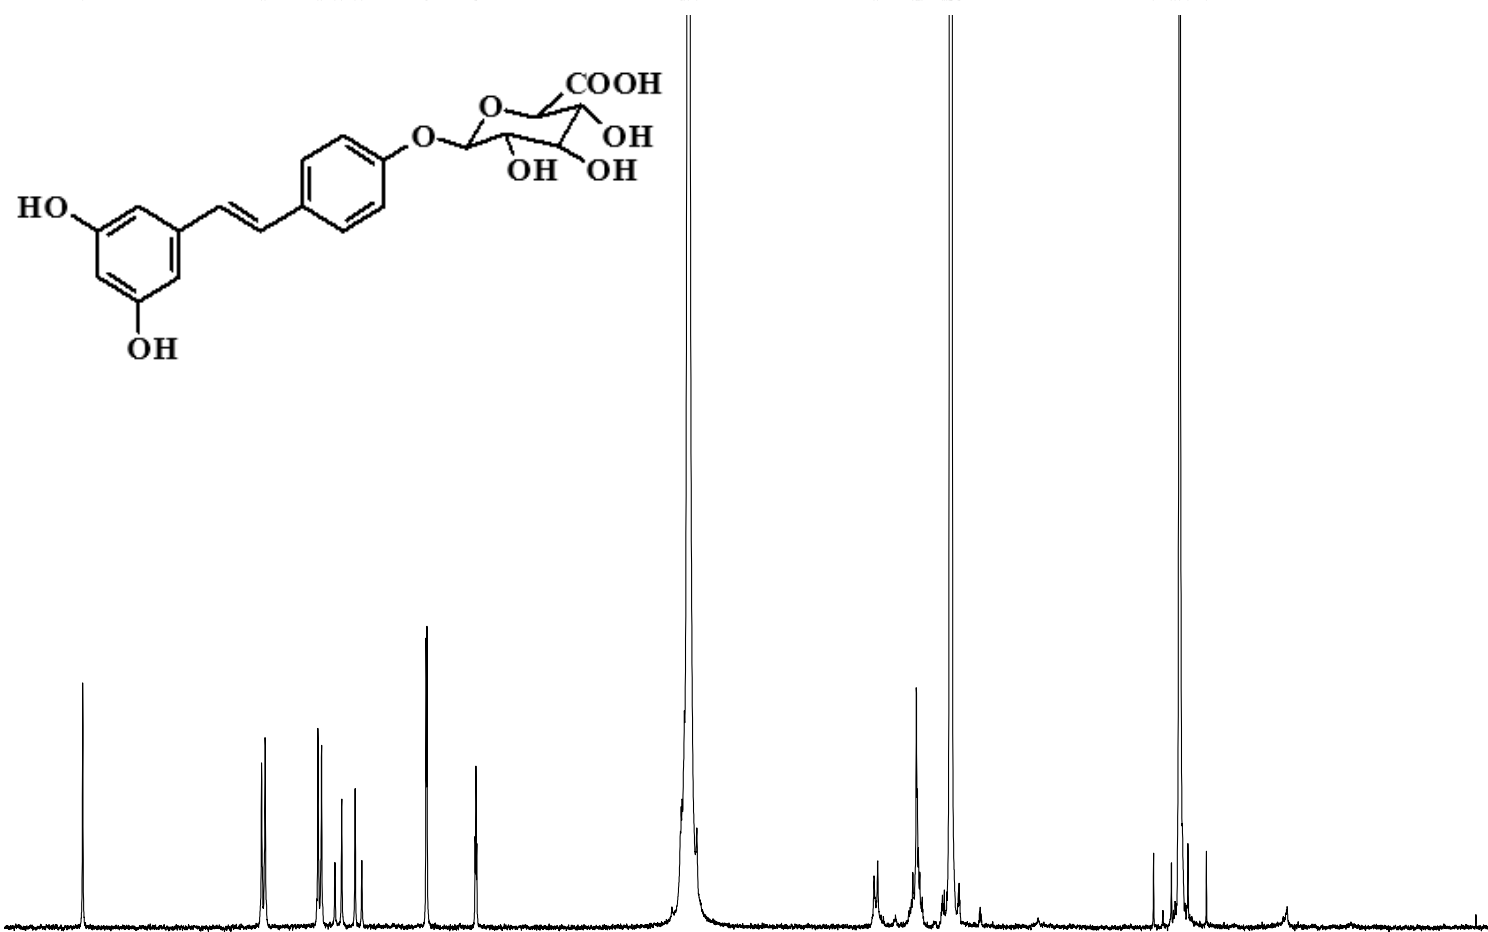

0.94  
2.00  
2.11  
1.05  
1.06  
1.99  
0.96  
79.20  
1.30  
3.47  
45.27  
41.28

NAME Jan29-2010-otit  
EXPNO 121  
PROCNO 1  
Date\_ 20100129  
Time 16.16  
INSTRUM spect  
PROBHD 5 mm PABBO BB-  
PULPROG zg30  
TD 65536  
SOLVENT MeOD  
NS 16  
DS 2  
SWH 8223.685 Hz  
FIDRES 0.125483 Hz  
AQ 3.9846387 s  
RG 203  
DW 60.800 us  
DE 6.50 us  
TE 296.5 K  
D1 1.00000000 s  
TD0 1

==== CHANNEL f1 =====  
NUC1 1H  
P1 14.80 us  
PL1 1.00 dB  
PL1W 8.75920200 dB  
SFO1 400.1324710 MHz  
SI 32768  
SF 400.1300094 MHz  
WDW EM  
SSB 0  
LB 0.30 MHz  
GB 0  
PC 1.00
