# Supplementary material
Source: PubMed Central journal article supplement (PMC3299880)
Supplement: NIHMS345799-supplement-05.pdf [file NIHMS345799-supplement-05.pdf]

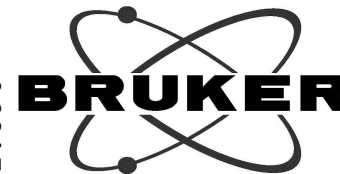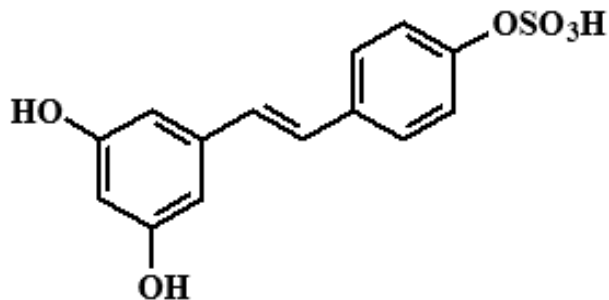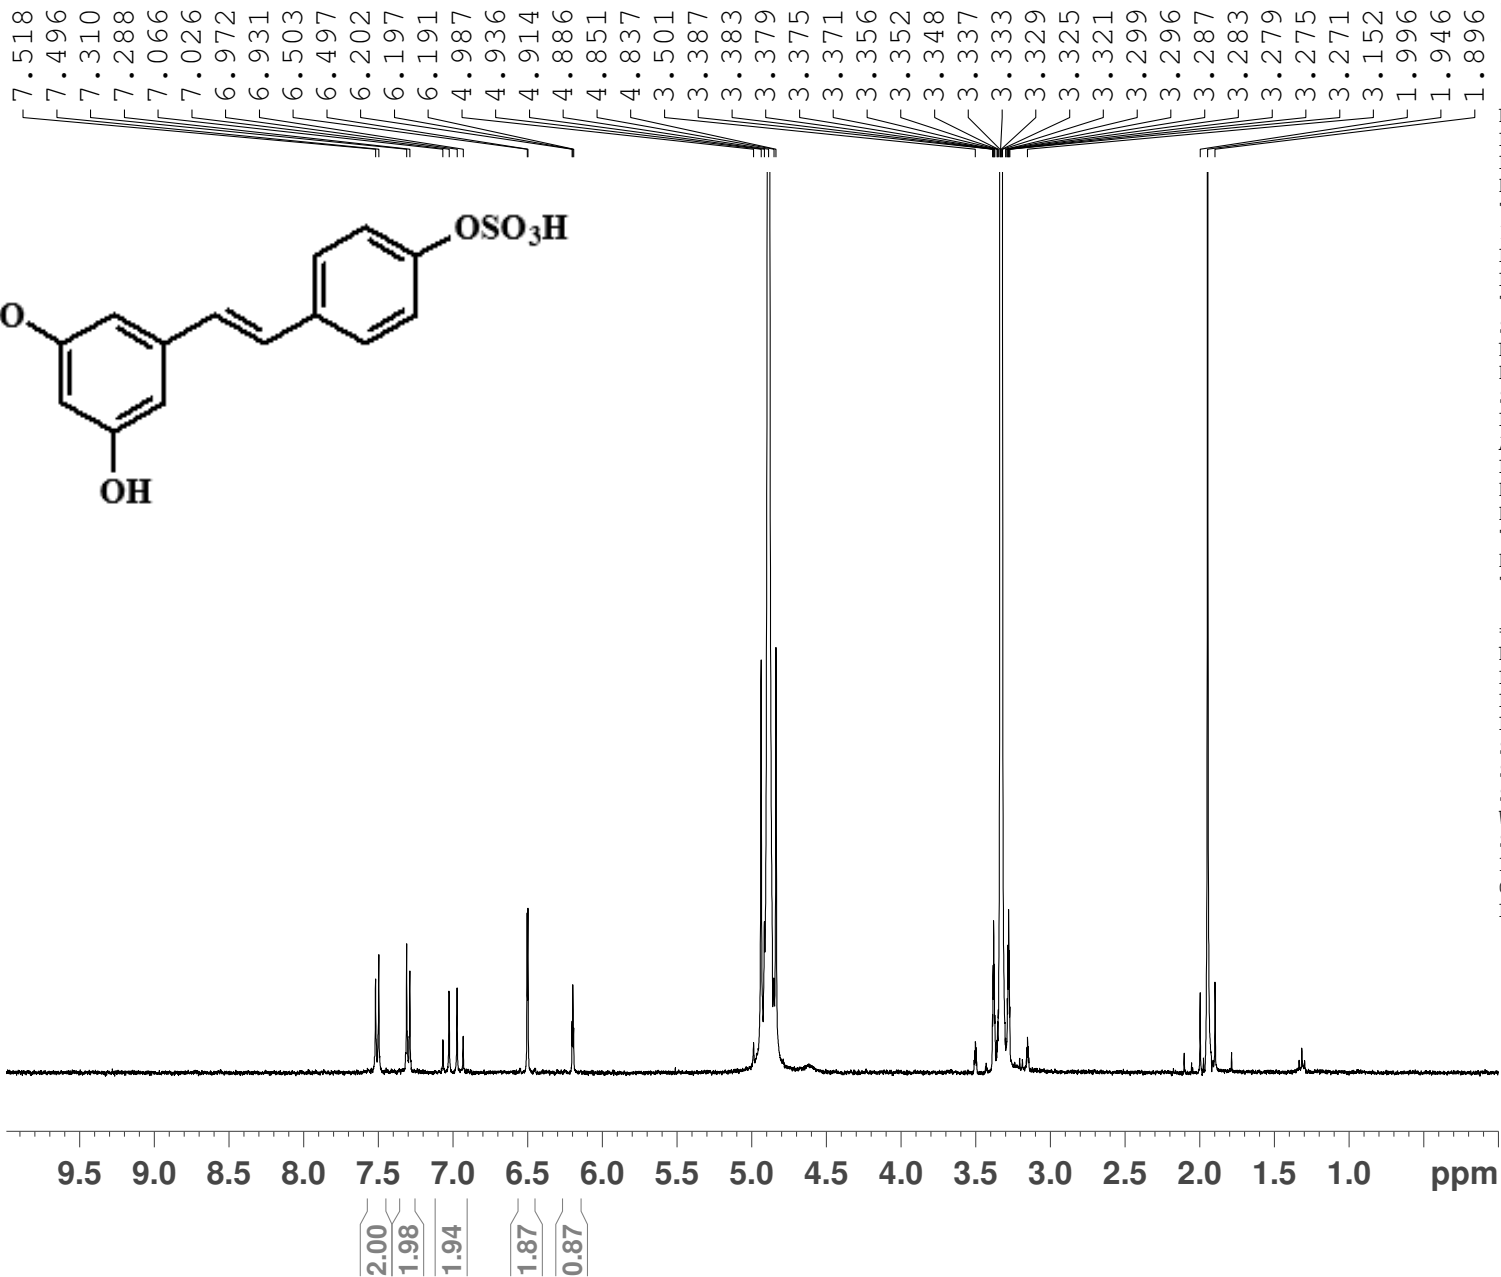

NAME Sep23-2009-otito  
EXPNO 21  
PROCNO 1  
Date\_ 20090923  
Time 11.44  
INSTRUM spect  
PROBHD 5 mm PABBO BB-  
PULPROG zg30  
TD 65536  
SOLVENT MeOD  
NS 16  
DS 2  
SWH 8223.685 Hz  
FIDRES 0.125483 Hz  
AQ 3.9846387 sec  
RG 203  
DW 60.800 usec  
DE 6.50 usec  
TE 297.3 K  
D1 1.00000000 sec  
TD0 1

==== CHANNEL f1 =====  
NUC1 1H  
P1 14.80 usec  
PL1 1.00 dB  
PL1W 8.75920200 W  
SFO1 400.1324710 MHz  
SI 32768  
SF 400.1300000 MHz  
WDW EM  
SSB 0  
LB 0.30 Hz  
GB 0  
PC 1.00
