# Supplementary material
Source: PubMed Central journal article supplement (PMC3299880)
Supplement: NIHMS345799-supplement-06.pdf [file NIHMS345799-supplement-06.pdf]

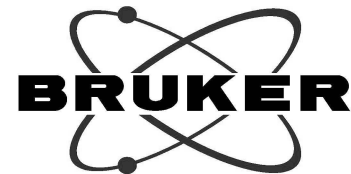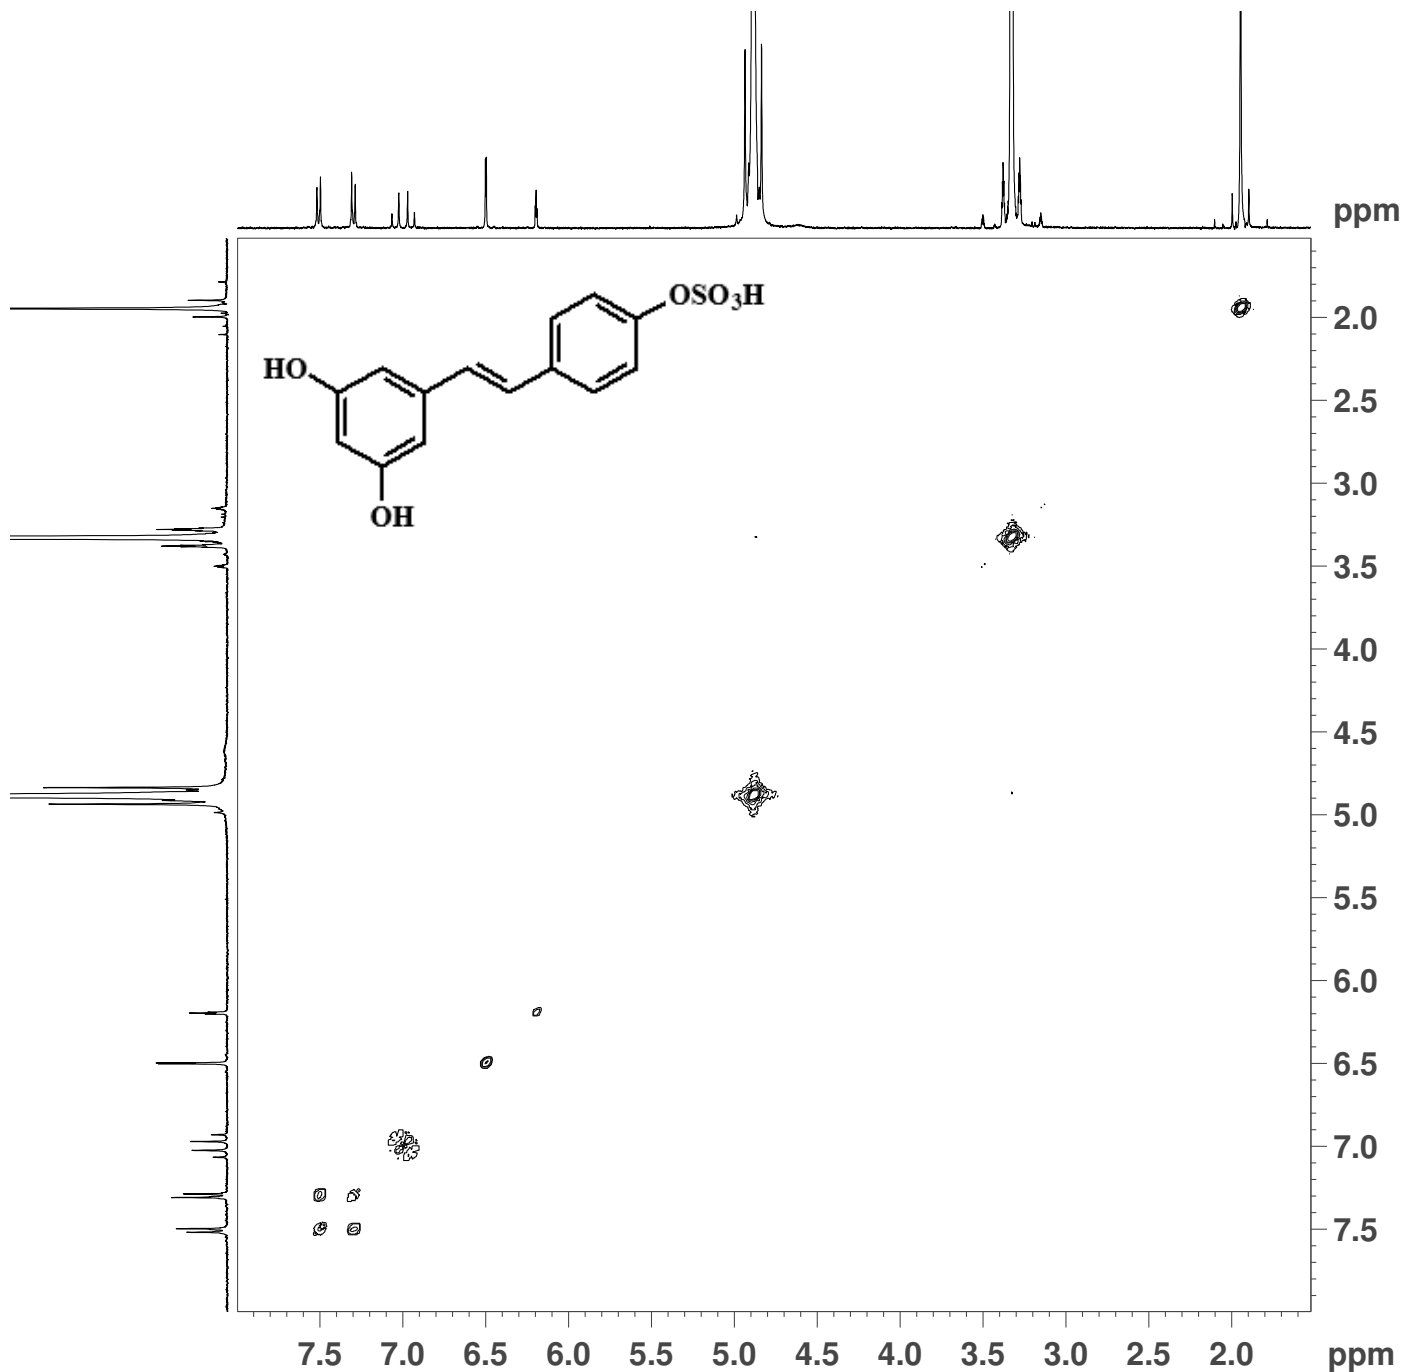

NAME Sep23-2009-otito  
EXPNO 22  
PROCNO 1  
Date\_ 20090923  
Time 11.45  
INSTRUM spect  
PROBHD 5 mm PABBO BB-  
PULPROG cosygpgf  
TD 2048  
SOLVENT MeOD  
NS 1  
DS 8  
SWH 2590.674 Hz  
FIDRES 1.264977 Hz  
AQ 0.3953140 sec  
RG 144  
DW 193.000 usec  
DE 6.50 usec  
TE 297.3 K  
D0 0.00000300 sec  
D1 1.28332102 sec  
D13 0.00000400 sec  
D16 0.00020000 sec  
IN0 0.00038600 sec

===== CHANNEL f1 =====  
NUC1 1H  
P0 14.80 usec  
P1 14.80 usec  
PL1 1.00 dB  
PL1W 8.75920200 W  
SFO1 400.1319044 MHz

===== GRADIENT CHANNEL =====  
GPNAM1 SINE.100  
GPZ1 10.00 %  
P16 1000.00 usec  
ND0 1  
TD 128  
SFO1 400.1319 MHz  
FIDRES 20.239637 Hz  
SW 6.475 ppm  
FnMODE QF  
SI 1024  
SF 400.1300000 MHz  
WDW SINE  
SSB 0  
LB 0.00 Hz  
GB 0  
PC 1.40  
SI 1024  
MC2 QF  
SF 400.1300000 MHz  
WDW SINE  
SSB 0  
LB 0.00 Hz  
GB 0
